# Supplementary material for: A generative learning model for saccade adaptation
Source: PubMed Central journal article supplement (PMC6703699; doi:10.1371/journal.pcbi.1006695), 2019-08-09
Supplement: pcbi.1006695.s001.pdf [file pcbi.1006695.s001.pdf]

**Table 1. Generative parameters fitted with the best four models.**

| Model <i>KAm</i> (ORIG)  |           |                        |            |                           |            |                         |            |
|--------------------------|-----------|------------------------|------------|---------------------------|------------|-------------------------|------------|
| Adaptation type          | Frequency | Learning rate <i>K</i> |            | Persistence rate <i>A</i> |            | Bias parameter <i>m</i> |            |
|                          |           | <i>mean</i>            | <i>SEM</i> | <i>mean</i>               | <i>SEM</i> | <i>mean</i>             | <i>SEM</i> |
| Two-way                  | 3 cpb     | 0.0119                 | 0.0027     | 0.9594                    | 0.0110     | - 0.0137                | 0.0041     |
|                          | 4 cpb     | 0.0109                 | 0.0027     | 0.9599                    | 0.0143     | - 0.0156                | 0.0056     |
|                          | 6 cpb     | 0.0135                 | 0.0039     | 0.9310                    | 0.0266     | - 0.0224                | 0.0080     |
| Global                   | 3 cpb     | 0.0052                 | 0.0012     | 0.9733                    | 0.0077     | - 0.0145                | 0.0048     |
|                          | 4 cpb     | 0.0046                 | 0.0007     | 0.9833                    | 0.0051     | - 0.0107                | 0.0040     |
|                          | 6 cpb     | 0.0045                 | 0.0015     | 0.9786                    | 0.0094     | - 0.0117                | 0.0044     |
| Model <i>KAm</i> (FREQ)  |           |                        |            |                           |            |                         |            |
| Two-way                  | 1 cpb     | 0.0121                 | 0.0015     | 0.9734                    | 0.0046     | - 0.0128                | 0.0037     |
|                          | 3 cpb     | 0.0254                 | 0.0087     | 0.9042                    | 0.0342     | - 0.0398                | 0.0204     |
|                          | 6 cpb     | 0.0217                 | 0.0052     | 0.9014                    | 0.0259     | - 0.0382                | 0.0125     |
|                          | 12 cpb    | 0.0247                 | 0.0079     | 0.8703                    | 0.0629     | - 0.0429                | 0.0260     |
|                          | 24 cpb    | 0.0374                 | 0.0162     | 0.8337                    | 0.1151     | - 0.0450                | 0.0244     |
| Global                   | 1 cpb     | 0.0092                 | 0.0024     | 0.9595                    | 0.0201     | - 0.0103                | 0.0030     |
|                          | 3 cpb     | 0.0103                 | 0.0044     | 0.9595                    | 0.0190     | - 0.0224                | 0.0119     |
|                          | 6 cpb     | 0.0139                 | 0.0068     | 0.8654                    | 0.0703     | - 0.0518                | 0.0272     |
|                          | 12 cpb    | 0.0153                 | 0.0062     | 0.9123                    | 0.0686     | - 0.0325                | 0.0216     |
|                          | 24 cpb    | 0.0073                 | 0.0038     | 0.9600                    | 0.0184     | - 0.0191                | 0.0077     |
| Model <i>KAmG</i> (ORIG) |           |                        |            |                           |            |                         |            |
| Adaptation type          | Frequency | Learning rate <i>K</i> |            | Persistence rate <i>A</i> |            | Bias parameter <i>m</i> |            |
|                          |           | <i>mean</i>            | <i>SEM</i> | <i>mean</i>               | <i>SEM</i> | <i>mean</i>             | <i>SEM</i> |
| Two-way                  | 3 cpb     | 0.0087                 | 0.0023     | 0.9739                    | 0.0109     | - 0.0091                | 0.0039     |
|                          | 4 cpb     | 0.0078                 | 0.0020     | 0.9785                    | 0.0092     | - 0.0118                | 0.0057     |
|                          | 6 cpb     | 0.0097                 | 0.0028     | 0.9463                    | 0.0258     | - 0.0152                | 0.0070     |
| Global                   | 3 cpb     | 0.0045                 | 0.0012     | 0.9832                    | 0.0067     | - 0.0087                | 0.0031     |
|                          | 4 cpb     | 0.0038                 | 0.0008     | 0.9932                    | 0.0026     | - 0.0045                | 0.0015     |
|                          | 6 cpb     | 0.0049                 | 0.0016     | 0.9794                    | 0.0094     | - 0.0101                | 0.0041     |
| Model <i>KAmG</i> (FREQ) |           |                        |            |                           |            |                         |            |
| Two-way                  | 1 cpb     | 0.0103                 | 0.0020     | 0.9811                    | 0.0051     | - 0.0081                | 0.0036     |
|                          | 3 cpb     | 0.0234                 | 0.0097     | 0.8725                    | 0.0842     | - 0.0241                | 0.0090     |
|                          | 6 cpb     | 0.0132                 | 0.0048     | 0.9638                    | 0.0211     | - 0.0147                | 0.0069     |
|                          | 12 cpb    | 0.0144                 | 0.0052     | 0.9506                    | 0.0365     | - 0.0392                | 0.0262     |
|                          | 24 cpb    | 0.0334                 | 0.0158     | 0.8293                    | 0.1300     | - 0.0645                | 0.0382     |
| Global                   | 1 cpb     | 0.0056                 | 0.0006     | 0.9838                    | 0.0032     | - 0.0066                | 0.0021     |
|                          | 3 cpb     | 0.0056                 | 0.0010     | 0.9819                    | 0.0068     | - 0.0096                | 0.0032     |
|                          | 6 cpb     | 0.0024                 | 0.0023     | 1.0010                    | 0.0121     | - 0.0020                | 0.0065     |
|                          | 12 cpb    | 0.0139                 | 0.0067     | 0.9195                    | 0.0735     | - 0.0286                | 0.0230     |
|                          | 24 cpb    | 0.0045                 | 0.0036     | 0.9993                    | 0.0044     | - 0.0026                | 0.0010     |

| Model $KmDG$ (ORIG) |           |                   |            |                   |            |                    |            |
|---------------------|-----------|-------------------|------------|-------------------|------------|--------------------|------------|
| Adaptation type     | Frequency | Learning rate $K$ |            | Learning rate $D$ |            | Bias parameter $m$ |            |
|                     |           | <i>mean</i>       | <i>SEM</i> | <i>mean</i>       | <i>SEM</i> | <i>mean</i>        | <i>SEM</i> |
| Two-way             | 3 cpb     | 0.1575            | 0.0168     | -0.1541           | 0.0167     | -0.0016            | 0.0003     |
|                     | 4 cpb     | 0.1351            | 0.0137     | -0.1313           | 0.0136     | -0.0017            | 0.0003     |
|                     | 6 cpb     | 0.1267            | 0.0173     | -0.1232           | 0.0170     | -0.0015            | 0.0003     |
| Global              | 3 cpb     | 0.0667            | 0.0177     | -0.0644           | 0.0176     | -0.0013            | 0.0002     |
|                     | 4 cpb     | 0.0448            | 0.0109     | -0.0416           | 0.0107     | -0.0018            | 0.0005     |
|                     | 6 cpb     | 0.0349            | 0.0179     | -0.0320           | 0.0175     | -0.0012            | 0.0007     |
| Model $KmDG$ (FREQ) |           |                   |            |                   |            |                    |            |
| Two-way             | 1 cpb     | 0.2235            | 0.0275     | -0.2210           | 0.0273     | -0.0013            | 0.0002     |
|                     | 3 cpb     | 0.1568            | 0.0308     | -0.1530           | 0.0308     | -0.0017            | 0.0004     |
|                     | 6 cpb     | 0.1233            | 0.0169     | -0.1171           | 0.0165     | -0.0026            | 0.0004     |
|                     | 12 cpb    | 0.0925            | 0.0101     | -0.0861           | 0.0107     | -0.0031            | 0.0007     |
|                     | 24 cpb    | 0.0831            | 0.0168     | -0.0751           | 0.0166     | -0.0035            | 0.0010     |
| Global              | 1 cpb     | 0.1018            | 0.0167     | -0.0996           | 0.0168     | -0.0012            | 0.0002     |
|                     | 3 cpb     | 0.0733            | 0.0151     | -0.0697           | 0.0152     | -0.0019            | 0.0003     |
|                     | 6 cpb     | 0.0521            | 0.0134     | -0.0509           | 0.0132     | -0.0009            | 0.0007     |
|                     | 12 cpb    | 0.0310            | 0.0110     | -0.0251           | 0.0112     | -0.0019            | 0.0005     |
|                     | 24 cpb    | 0.0340            | 0.0095     | -0.0271           | 0.0086     | -0.0029            | 0.0009     |

| Model $KAmDG$ (ORIG) |           |                   |            |                   |            |                      |            |                    |            |
|----------------------|-----------|-------------------|------------|-------------------|------------|----------------------|------------|--------------------|------------|
| Adaptation type      | Frequency | Learning rate $K$ |            | Learning rate $D$ |            | Persistence rate $A$ |            | Bias parameter $m$ |            |
|                      |           | <i>Mean</i>       | <i>SEM</i> | <i>Mean</i>       | <i>SEM</i> | <i>mean</i>          | <i>SEM</i> | <i>mean</i>        | <i>SEM</i> |
| Two-way              | 3 cpb     | 0.1552            | 0.0170     | -0.1519           | 0.0170     | 0.9994               | 0.0013     | -0.0020            | 0.0006     |
|                      | 4 cpb     | 0.1199            | 0.0206     | -0.1152           | 0.0215     | 0.9950               | 0.0063     | -0.0029            | 0.0014     |
|                      | 6 cpb     | 0.1255            | 0.0178     | -0.1216           | 0.0174     | 0.9973               | 0.0017     | -0.0022            | 0.0004     |
| Global               | 3 cpb     | 0.0784            | 0.0197     | -0.0761           | 0.0196     | 1.0014               | 0.0033     | -0.0014            | 0.0015     |
|                      | 4 cpb     | 0.0254            | 0.0147     | -0.0215           | 0.0145     | 0.9892               | 0.0057     | -0.0081            | 0.0039     |
|                      | 6 cpb     | 0.0328            | 0.0166     | -0.0294           | 0.0161     | 0.9932               | 0.0032     | -0.0042            | 0.0011     |
| Model $KAmDG$ (FREQ) |           |                   |            |                   |            |                      |            |                    |            |
| Two-way              | 1 cpb     | 0.1642            | 0.0566     | -0.1588           | 0.0583     | 0.9914               | 0.0063     | -0.0058            | 0.0034     |
|                      | 3 cpb     | 0.1338            | 0.0263     | -0.1255           | 0.0257     | 0.9828               | 0.0086     | -0.0108            | 0.0061     |
|                      | 6 cpb     | 0.1177            | 0.0222     | -0.1099           | 0.0229     | 0.9902               | 0.0163     | -0.0086            | 0.0067     |
|                      | 12 cpb    | 0.0912            | 0.0105     | -0.0835           | 0.0103     | 0.9917               | 0.0077     | -0.0093            | 0.0052     |
|                      | 24 cpb    | 0.0850            | 0.0171     | -0.0735           | 0.0161     | 0.9976               | 0.0061     | -0.0069            | 0.0029     |
| Global               | 1 cpb     | 0.0518            | 0.0567     | -0.0476           | 0.0581     | 0.9905               | 0.0085     | -0.0067            | 0.0035     |
|                      | 3 cpb     | 0.0505            | 0.0278     | -0.0452           | 0.0294     | 0.9883               | 0.0104     | -0.0095            | 0.0060     |
|                      | 6 cpb     | 0.0568            | 0.0159     | -0.0547           | 0.0154     | 0.9934               | 0.0086     | -0.0026            | 0.0033     |
|                      | 12 cpb    | 0.0319            | 0.0112     | -0.0254           | 0.0114     | 1.0017               | 0.0030     | -0.0015            | 0.0010     |
|                      | 24 cpb    | 0.0318            | 0.0094     | -0.0290           | 0.0085     | 0.9978               | 0.0045     | -0.0025            | 0.0010     |

Model name and dataset are shown at the top. The corresponding datasets can also be identified by the stimulus frequencies tested: ORIG: 3, 4 and 6cpb. FREQ: 1, 3, 6, 12 and 24cpb. The initial condition parameter is not reported.
