# Supplementary material for: A generative learning model for saccade adaptation
Source: PubMed Central journal article supplement (PMC6703699; doi:10.1371/journal.pcbi.1006695), 2019-08-09
Supplement: pcbi.1006695.s002.pdf [file pcbi.1006695.s002.pdf]

**Table 2. ANOVA results on the generative parameters fitted with the best four models.**

| Dataset |           | FREQ  |         | $K$  |         | $A$  |         | $m$   |         | $D$   |         | $G$  |         | $\kappa = K + D$ |         | $\eta = K - D$ |         |
|---------|-----------|-------|---------|------|---------|------|---------|-------|---------|-------|---------|------|---------|------------------|---------|----------------|---------|
| Model   | Regressor | $F$   | $p > F$ | $F$  | $p > F$ | $F$  | $p > F$ | $F$   | $p > F$ | $F$   | $p > F$ | $F$  | $p > F$ | $F$              | $p > F$ | $F$            | $p > F$ |
| $KAm$   | Freq      | 0.89  | 0.47    | 0.89 | 0.48    | 1.01 | 0.41    | N/A   | N/A     | N/A   | N/A     | N/A  | N/A     | N/A              | N/A     | N/A            | N/A     |
|         | Type      | 8.07  | 0.01    | 1.96 | 0.19    | 1.22 | 0.29    |       |         |       |         |      |         |                  |         |                |         |
|         | Subj      | 1.84  | 0.22    | 2.85 | 0.13    | 2.96 | 0.10    |       |         |       |         |      |         |                  |         |                |         |
|         | Freq*Type | 1.10  | 0.37    | 0.75 | 0.56    | 0.41 | 0.80    |       |         |       |         |      |         |                  |         |                |         |
|         | Freq*Subj | 0.86  | 0.71    | 1.00 | 0.49    | 1.11 | 0.36    |       |         |       |         |      |         |                  |         |                |         |
|         | Type*Subj | 1.05  | 0.42    | 0.57 | 0.85    | 0.54 | 0.88    |       |         |       |         |      |         |                  |         |                |         |
| $KAmG$  | Freq      | 1.18  | 0.33    | 0.68 | 0.61    | 1.35 | 0.27    | N/A   | N/A     | 0.10  | 0.98    | N/A  | N/A     | N/A              | N/A     | N/A            | N/A     |
|         | Type      | 8.57  | 0.01    | 2.70 | 0.13    | 2.71 | 0.13    |       |         | 0.01  | 0.93    |      |         |                  |         |                |         |
|         | Subj      | 0.90  | 0.59    | 0.75 | 0.69    | 0.78 | 0.67    |       |         | 2.34  | 0.05    |      |         |                  |         |                |         |
|         | Freq*Type | 1.30  | 0.28    | 1.16 | 0.34    | 1.18 | 0.33    |       |         | 1.68  | 0.17    |      |         |                  |         |                |         |
|         | Freq*Subj | 0.80  | 0.78    | 1.04 | 0.44    | 1.05 | 0.43    |       |         | 1.75  | 0.03    |      |         |                  |         |                |         |
|         | Type*Subj | 0.95  | 0.50    | 1.07 | 0.41    | 1.58 | 0.13    |       |         | 0.84  | 0.61    |      |         |                  |         |                |         |
| $KmDG$  | Freq      | 21.38 | 0.00    | N/A  | N/A     | 4.60 | < 0.01  | 23.16 | 0.00    | 1.03  | 0.40    | 5.97 | < 0.001 | 22.31            | 0.00    | N/A            | N/A     |
|         | Type      | 35.12 | < 0.01  |      |         | 3.33 | 0.09    | 34.69 | < 0.001 | 0.00  | 0.99    | 1.63 | 0.23    | 34.97            | < 0.001 |                |         |
|         | Subj      | 2.81  | 0.05    |      |         | 2.45 | 0.10    | 2.84  | 0.05    | 13.62 | < 0.001 | 0.90 | 0.59    | 2.83             | 0.05    |                |         |
|         | Freq*Type | 2.16  | 0.09    |      |         | 1.13 | 0.35    | 2.29  | 0.07    | 0.83  | 0.51    | 0.92 | 0.46    | 2.23             | 0.09    |                |         |
|         | Freq*Subj | 0.97  | 0.54    |      |         | 0.89 | 0.65    | 0.99  | 0.51    | 1.31  | 0.18    | 0.65 | 0.93    | 0.98             | 0.52    |                |         |
|         | Type*Subj | 2.38  | 0.02    |      |         | 1.33 | 0.24    | 2.36  | 0.02    | 0.62  | 0.82    | 1.33 | 0.23    | 2.37             | 0.02    |                |         |
| $KAmDG$ | Freq      | 1.24  | 0.31    | 0.72 | 0.58    | 0.57 | 0.69    | 1.30  | 0.28    | 0.12  | 0.98    | 0.64 | 0.64    | 1.27             | 0.30    | N/A            | N/A     |
|         | Type      | 15.81 | < 0.01  | 0.59 | 0.46    | 2.00 | 0.18    | 14.30 | < 0.01  | 0.01  | 0.94    | 5.17 | 0.04    | 15.08            | < 0.01  |                |         |
|         | Subj      | 1.81  | 0.25    | 1.81 | 0.27    | 1.68 | 0.22    | 1.96  | 0.24    | 3.65  | < 0.01  | 0.62 | 0.80    | 1.89             | 0.25    |                |         |
|         | Freq*Type | 0.34  | 0.85    | 0.13 | 0.97    | 0.39 | 0.81    | 0.38  | 0.82    | 2.03  | 0.10    | 1.85 | 0.14    | 0.36             | 0.84    |                |         |
|         | Freq*Subj | 0.82  | 0.76    | 0.89 | 0.65    | 1.04 | 0.45    | 0.80  | 0.78    | 2.30  | < 0.01  | 1.48 | 0.09    | 0.81             | 0.77    |                |         |
|         | Type*Subj | 0.98  | 0.48    | 0.74 | 0.70    | 1.12 | 0.36    | 0.91  | 0.54    | 2.02  | 0.04    | 2.73 | < 0.01  | 0.94             | 0.52    |                |         |

| Dataset ORIG |           | $K$   |         | $A$  |         | $m$  |         | $D$   |         | $G$  |         | $\kappa = K + D$ |         | $\eta = K - D$ |         |      |      |
|--------------|-----------|-------|---------|------|---------|------|---------|-------|---------|------|---------|------------------|---------|----------------|---------|------|------|
| Model        | Regressor | $F$   | $p > F$ | $F$  | $p > F$ | $F$  | $p > F$ | $F$   | $p > F$ | $F$  | $p > F$ | $F$              | $p > F$ | $F$            | $p > F$ |      |      |
| $KAm$        | Freq      | 0.23  | 0.80    | 0.74 | 0.49    | 0.36 | 0.70    | N/A   | N/A     | N/A  | N/A     | N/A              | N/A     | N/A            | N/A     |      |      |
|              | Type      | 12.64 | < 0.01  | 8.09 | 0.02    | 2.18 | 0.17    |       |         |      |         |                  |         |                |         |      |      |
|              | Subj      | 1.58  | 0.30    | 1.17 | 0.42    | 2.79 | 0.23    |       |         |      |         |                  |         |                |         |      |      |
|              | Freq*Type | 0.26  | 0.77    | 1.09 | 0.36    | 0.70 | 0.51    |       |         |      |         |                  |         |                |         |      |      |
|              | Freq*Subj | 0.90  | 0.59    | 1.43 | 0.23    | 0.97 | 0.53    |       |         |      |         |                  |         |                |         |      |      |
|              | Type*Subj | 1.64  | 0.18    | 1.07 | 0.43    | 0.70 | 0.70    |       |         |      |         |                  |         |                |         |      |      |
| $KAmG$       | Freq      | 0.39  | 0.68    | 1.45 | 0.26    | 0.5  | 0.62    | N/A   | N/A     | N/A  | N/A     | N/A              | N/A     | N/A            | N/A     |      |      |
|              | Type      | 12.66 | < 0.01  | 6.61 | 0.03    | 5.77 | 0.04    |       |         |      |         |                  |         |                |         | 0.82 | 0.46 |
|              | Subj      | 2.13  | 0.10    | 1.49 | 0.25    | 2.35 | 0.16    |       |         |      |         |                  |         |                |         | 4.97 | 0.05 |
|              | Freq*Type | 0.05  | 0.95    | 1.01 | 0.38    | 0.49 | 0.62    |       |         |      |         |                  |         |                |         | 3.10 | 0.14 |
|              | Freq*Subj | 2.20  | 0.05    | 2.46 | 0.03    | 1.86 | 0.10    |       |         |      |         |                  |         |                |         | 0.51 | 0.61 |
|              | Type*Subj | 1.58  | 0.20    | 1.06 | 0.43    | 0.37 | 0.93    |       |         |      |         |                  |         |                |         | 0.64 | 0.82 |
| $KmDG$       | Freq      | 5.31  | 0.02    | N/A  | N/A     | 0.62 | 0.55    | 5.24  | 0.02    | 0.37 | 0.70    | 0.64             | 0.54    | 5.27           | 0.02    |      |      |
|              | Type      | 36.94 | < 0.001 |      |         | 0.35 | 0.57    | 37.57 | < 0.001 | 6.07 | 0.04    | 2.45             | 0.15    | 37.26          | < 0.001 |      |      |
|              | Subj      | 1.91  | 0.17    |      |         | 1.40 | 0.36    | 1.87  | 0.17    | 4.46 | 0.13    | 1.10             | 0.45    | 1.89           | 0.17    |      |      |
|              | Freq*Type | 0.00  | 1.00    |      |         | 0.14 | 0.87    | 0.01  | 0.99    | 0.09 | 0.91    | 0.21             | 0.81    | 0.00           | 1.00    |      |      |
|              | Freq*Subj | 1.25  | 0.32    |      |         | 1.10 | 0.42    | 1.35  | 0.27    | 0.64 | 0.82    | 1.54             | 0.18    | 1.30           | 0.29    |      |      |
|              | Type*Subj | 4.31  | < 0.01  |      |         | 1.09 | 0.41    | 4.29  | < 0.01  | 1.20 | 0.35    | 1.24             | 0.33    | 4.30           | < 0.01  |      |      |
| $KAmDG$      | Freq      | 3.82  | 0.04    | 1.62 | 0.23    | 2.26 | 0.13    | 3.82  | 0.04    | 0.07 | 0.94    | 1.88             | 0.18    | 3.82           | 0.04    |      |      |
|              | Type      | 30.75 | < 0.001 | 1.10 | 0.32    | 2.09 | 0.18    | 31.03 | < 0.001 | 3.65 | 0.09    | 2.19             | 0.17    | 30.90          | < 0.001 |      |      |
|              | Subj      | 0.99  | 0.48    | 0.88 | 0.56    | 1.01 | 0.49    | 0.94  | 0.51    | 3.79 | 0.11    | 1.71             | 0.31    | 0.97           | 0.50    |      |      |
|              | Freq*Type | 0.64  | 0.54    | 1.02 | 0.38    | 2.01 | 0.16    | 0.70  | 0.51    | 0.25 | 0.78    | 0.09             | 0.92    | 0.67           | 0.52    |      |      |
|              | Freq*Subj | 4.07  | < 0.01  | 2.61 | 0.02    | 1.60 | 0.16    | 4.47  | < 0.01  | 0.69 | 0.78    | 1.14             | 0.39    | 4.27           | < 0.01  |      |      |
|              | Type*Subj | 5.15  | < 0.01  | 1.09 | 0.42    | 1.69 | 0.16    | 5.19  | < 0.01  | 1.42 | 0.25    | 1.74             | 0.67    | 5.18           | < 0.01  |      |      |

Repeated-measures ANOVA (2 X 3 on data from ORIG; 2 X 5 on data from FREQ) with factors type of adaptation and stimulus frequency was run on each of the four best models. Model name is shown at the side of the table and parameter names are on the top. The dataset is indicated in the cell at the upper left corner next to the parameter names. Highlights indicate the cases where the corresponding factor reached significance level.
