# Supplementary material for: A generative learning model for saccade adaptation
Source: PubMed Central journal article supplement (PMC6703699; doi:10.1371/journal.pcbi.1006695), 2019-08-09
Supplement: pcbi.1006695.s003.pdf [file pcbi.1006695.s003.pdf]

1 **S1 Appendix. Predictions of a state-equation with a single, most-recent error-based**  
2 **correction term. Effects of including next-to-last error-sampling.**

3 *Iteration of a KAmG model.* We can obtain an idea of the expected responses by iteration of  
4 **Equation 5.** For simplicity, we drop the term involving the second-to-last error ( $D = 0$ ) to obtain:

$$5 \quad x(n+1) = \left[ G(A-K)^n + \{1 - (A-K)^n\} \frac{m}{1 - (A-K)} \right] + K \sum_{i=1}^n v(i) (A-K)^{n-i}. \quad (A1)$$

6 We have inserted **Equation 2** so that  $v(i)$  represents the portion of  $s(n)$  that depends on the trial  
7 number. For sinusoidal adaptation datasets,  $v(i) = p(i) \cdot \sin\left(\frac{2\pi f}{N} i\right)$ . **Equation A1** can be split into  
8 two major contributions, one involving only constant features of the disturbance (terms inside the  
9 square brackets) and another accounting for the portions of the disturbance featuring systematic  
10 variation. This structure resembles closely the two components identified in our recent  
11 phenomenological study of sinusoidal adaptation data [11,12,43,44].

12 *Baseline drift: What is  $m$  and why do we need it?*

13 The first term of **Equation A1** describes a decaying drift similar to what we observed in the data. It  
14 is interesting to note the structure of this *response to no-perturbation* stimulus, since the bias  $m$   
15 accounts for intrinsic properties of the visuomotor system and the term involving the stimulus  $v(i)$   
16 has been left out. To understand better its evolution with the trial number, it can be rewritten as:

$$17 \quad b(n+1) = \frac{m}{1 - (A-K)} + \left[ G - \frac{m}{1 - (A-K)} \right] (A-K)^n \quad (A2)$$

18 The first term of **Equation A2** is independent of  $n$  and therefore represents an asymptotic value  
19 once all dependence on the trial number had subsided. The second term has a coefficient in front  
20 that depends on the initial condition ( $G$ ) and, because there is no true stimulus except for that initial  
21 value and the bias  $m$ , it will decay as the trial number progresses as long as  $(A-K)$  is smaller than  
22 1. In this case, it can be rewritten in terms of a *timescale* defined by the identity:  $e^{-\lambda} \equiv (A-K)$ . Both  
23 **Equation A1** and **A2** indicate that  $(A-K)^n$  are coefficients that weigh the contribution of the

24 stimulus to the response. This *convolution* arises naturally as a consequence of iterating the simple  
 25 version of the equation (for example, that of model  $KAm$  or  $KAmG$ ). Note that, as long as  $0 <$   
 26  $(A - K) < 1$ , the smaller the value of this first-trial weight, the faster its power will go to zero as the  
 27 trial number  $n$  increases. Thus, we define an *integration window* given by the number of trials that it  
 28 takes for the weight to decrease to a size of  $1/e$ . Therefore, this integration window has size equal  
 29 to  $(\lambda)^{-1}$  trials. Therefore, the closer the parameter combination given by  $(A - K)$  gets to 1, the  
 30 smaller the value of timescale  $\lambda$ , and the larger the window of integration, over which collecting  
 31 weighted contributions from the stimulus adds significantly to the response.

32 The simplest state-equation (cf. [19] ) is recovered when  $A = 1$ , and  $m = 0$ . In that case the  
 33 asymptote for our adaptation gain vanishes and one would expect the baseline to remain unchanged.  
 34 However, we observed a pervasive drift towards higher hypometria across all conditions in the  
 35 majority of the participants. This inward drift of the baseline can be modeled assuming that  $m < 0$ ,  
 36 which could be interpreted as a systematic tendency to undershoot. As mentioned above, the  
 37 sinusoidal stimulus does not contain any constant part because the disturbance is fully sinusoidal  
 38 and centered at zero mean. Therefore,  $m$  is required to model the drift that we observed in the  
 39 adaptation gain.

40 This is not the only reason why the simplest version of the state equation needs to be modified.  
 41 Already in the case of a disturbance that only includes a constant part  $c$  (of positive or negative sign  
 42 for outward or inward adaptation respectively), **Equation A2** will acquire an extra term proportional  
 43 to that constant part, weighted by the learning rate  $K$ :

$$44 \quad b(n + 1) = \frac{m}{1 - (A - K)} + \left[ G - \frac{m}{1 - (A - K)} \right] (A - K)^n + \frac{K}{1 - (A - K)} c [1 - (A - K)^n] \quad (A3)$$

45 Under the simplest state-equation ( $m = 0, A = 1$ ) all that remains from **Equation A3** is  $b(n + 1) =$   
 46  $c[1 - (1 - K)^n]$ . Therefore, the asymptote would become  $c$  predicting fully complete adaptation,  
 47 which is not typically observed in paradigms that employ fixed-size or random disturbances (Herman  
 48 et al. 2013). The presence of  $m$  would prevent full adaptation. Lack of full completeness of adaptation

49 could also be a consequence of a retention parameter  $A < 1$ . However, because the disturbance  
50 that we used does not have a constant component, even if  $A < 1$ , the model will not produce any  
51 drift of the baseline (cf. **Equations A2** and **A3**). In experimental protocols that use fixed-step  
52 adaptation, where the disturbance has a constant component, this confound between the effects of  
53  $m$  and  $A$  cannot be avoided. Hence, in the main text, we stress the importance of  $m$  in our model  
54 and we will discuss possible origins and alternative interpretations for such term.

55 *Stimulus convolution.*

56 The second term in the RHS of **Equation A1** is a convolution of the variable part of the disturbance.  
57 For the sinusoidal disturbances used in our datasets, it produces the sinusoidal component of the  
58 oculomotor response.

$$59 \quad h(n+1) = K \sum_{i=1}^n p(i) \sin(\omega i) (A - K)^{n-i}. \quad (A4)$$

60 The latest experienced stimulus (at trial  $n$ ) will be fully weighted because  $i = n$ . Increasing powers  
61 of  $(A - K)$  will progressively attenuate subsequent older instances of the stimulus until  $i$  becomes  
62 small enough so that  $(A - K)^{n-i}$  becomes negligibly small. This defines a window of trials over which  
63 the stimulus contributes in a relevant manner to the oculomotor response. Note that **Equation A4**  
64 resembles a harmonic components expansion of a pattern with fundamental frequency given by  
65  $\omega \sim \frac{1}{T}$ , where  $T$  is commensurate with the intertrial interval. By design  $\omega = \frac{2\pi f}{N}$ , where  $f$  is the  
66 frequency of the stimulus in saccades per block. This expansion of the resulting response start with  
67 a fundamental frequency determined by the inter-trial interval  $T$ .

68 *Baseline drift in models with double error-sampling ( $D$ ).*

69 Next we consider, based on **Equation 12**, how the evolution of the baseline drift is expected to  
70 behave and how the timescale and window of integration change upon including a non-zero  $D$ . When  
71  $D = 0$ , **Equation 12** gave us the first-trial weight. We obtained all weights that enter the responses  
72 in **Equation A1** and **A2** (the weights that conform the impulse response or the weights of the stimulus  
73 convolution) by raising the first-trial weight to the trial number. We extracted these relations by simply

74 iterating **Equation 5** without  $D$ . When  $D$  is present and non zero, an expression similar to **Equation**  
 75 **A2** can be obtained, except that the term evolving with the trial number has two contributions of the  
 76 form

$$77 \sim \frac{1}{2} \left\{ \alpha(G_1, G_2) \left[ (A - K) + \sqrt{(A - K)^2 + 4 \cdot D} \right]^n + \beta(G_1, G_2) \left[ (A - K) - \sqrt{(A - K)^2 + 4 \cdot D} \right]^n \right\}, \quad (\text{A5})$$

78 where  $G_1$  and  $G_2$  are the values of the gain in the first two trials (initial conditions). To visualize the  
 79 changes, using the fitted values of the parameters we computed the corresponding first-trial weights  
 80 that enter **Equation A2** and **A5** for each participant. We then took the average of these weights in  
 81 each condition and plotted the sequence given by the first-trial weight raised to the trial difference  
 82 with respect the current trial. In other words, we plotted the weights that would enter a stimulus  
 83 convolution or, equivalently, the weights that form the impulse response for the corresponding model.  
 84 The results are shown in **Fig A** for models  $KAm$  (solid lines) and  $KmDG$  (dashed lines). The plots  
 85 show a sizeable increase in the window of integration in model  $KmDG$  with respect to that resulting  
 86 for the parameters of model  $KAm$ , as pointed out in the **Results** section.

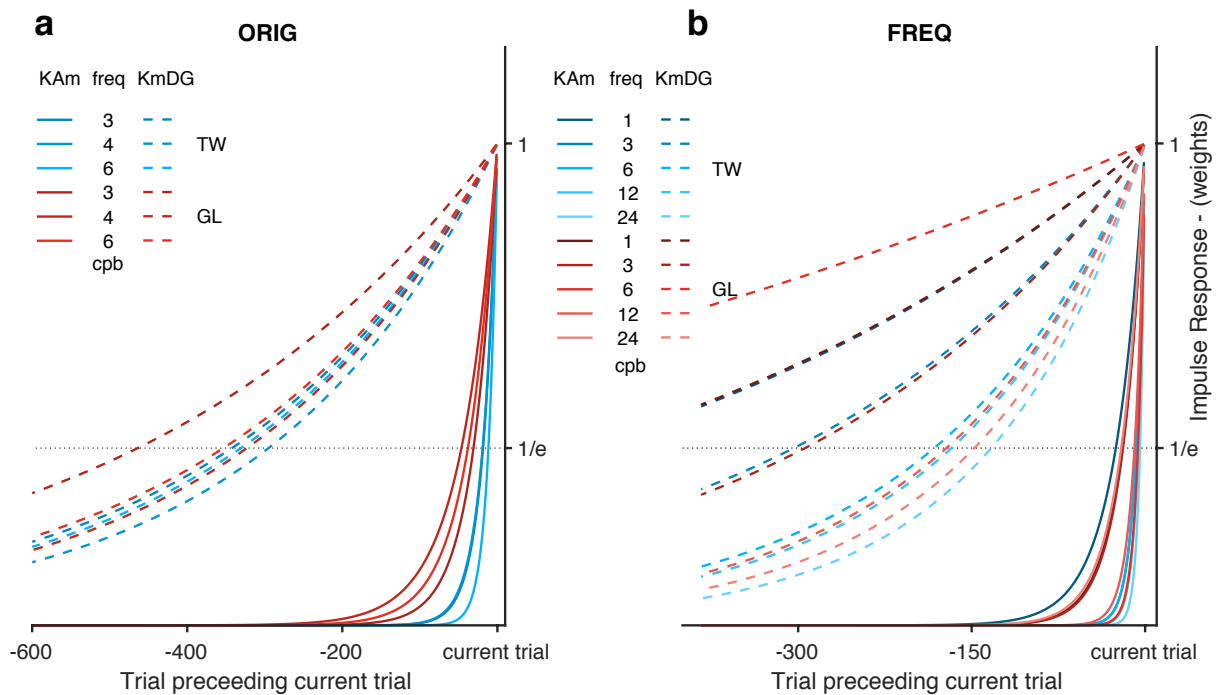

87

88 **Fig A. Exploration of the 'window of integration'.** Weights of the convolution term in **Equation A4** and **A5** (cf. also  
 89 **Equation 12** in the **Methods** section) as a function of the trial number for models  $KAm$  (solid lines) and  $KmDG$  (dashed  
 90 lines), for dataset **ORIG** (**a**) and **FREQ** (**b**) analyzed in the manuscript. To determine the weights, we used the average of

91 the timescales computed with the parameters fitted to the individual data in each condition. The number of trials that takes  
92 for the magnitude of the weights to decay to  $1/e$  of its initial value gives an estimate of the window of integration. Including  
93 double error-sampling and the second learning rate  $D$  produces a significant increase in the window of integration with  
94 respect to the model without double error-sampling. In general, in models without  $D$  the first-trial weight always equals  $A -$   
95  $K$ , so that higher learning rates and smaller persistence rates result in smaller integration windows. This rigidity in the  
96 weighting of the experienced stimulus can be softened by keeping memory of, and learning from further errors in the past.
